# Supplementary material for: Bio-optical characterization of subsurface chlorophyll maxima in the Mediterranean Sea from a Biogeochemical-Argo float database
Source: Copernicus journal article supplement (doi:10.5194/bg-16-1321-2019), 2019-04-01
Supplement: Supplementary file 1 [file bg-16-1321-2019-supplement.zip]

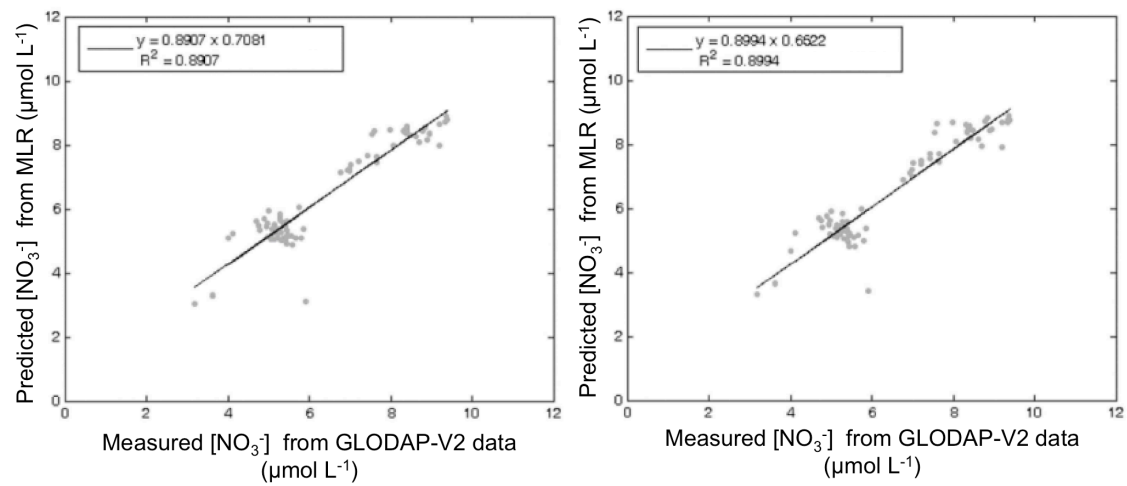

**Figure S1:** Nitrate concentrations between 900 and 1050 dbar predicted by the MLR as a function of nitrates concentrations actually measured. In the left panel, the relationship for the model taking into account oxygen, in the right panel the relationship for the model without oxygen.
