# Supplementary material for: Bio-optical characterization of subsurface chlorophyll maxima in the Mediterranean Sea from a Biogeochemical-Argo float database
Source: Copernicus journal article supplement (doi:10.5194/bg-16-1321-2019), 2019-04-01
Supplement: Supplementary file 2 [file bg-16-1321-2019-supplement.zip]

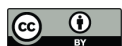

## *Supplement of*

# **Bio-optical characterization of subsurface chlorophyll maxima in the Mediterranean Sea from a Biogeochemical-Argo float database**

**Marie Barbieux et al.**

*Correspondence to:* Marie Barbieux ([marie.barbieux@obs-vlfr.fr](mailto:marie.barbieux@obs-vlfr.fr))

- [bg-16-1321-2019-supplement-title-page.pdf](#)
- Supplements
  - [Supplement1.pdf](#)
  - [Supplement2.pdf](#)

The copyright of individual parts of the supplement might differ from the CC BY 4.0 License.
